# Supplementary material
Source: PubMed Central journal article supplement (PMC10524830)
Supplement: NIHMS1895649-supplement-2.pdf [file NIHMS1895649-supplement-2.pdf]

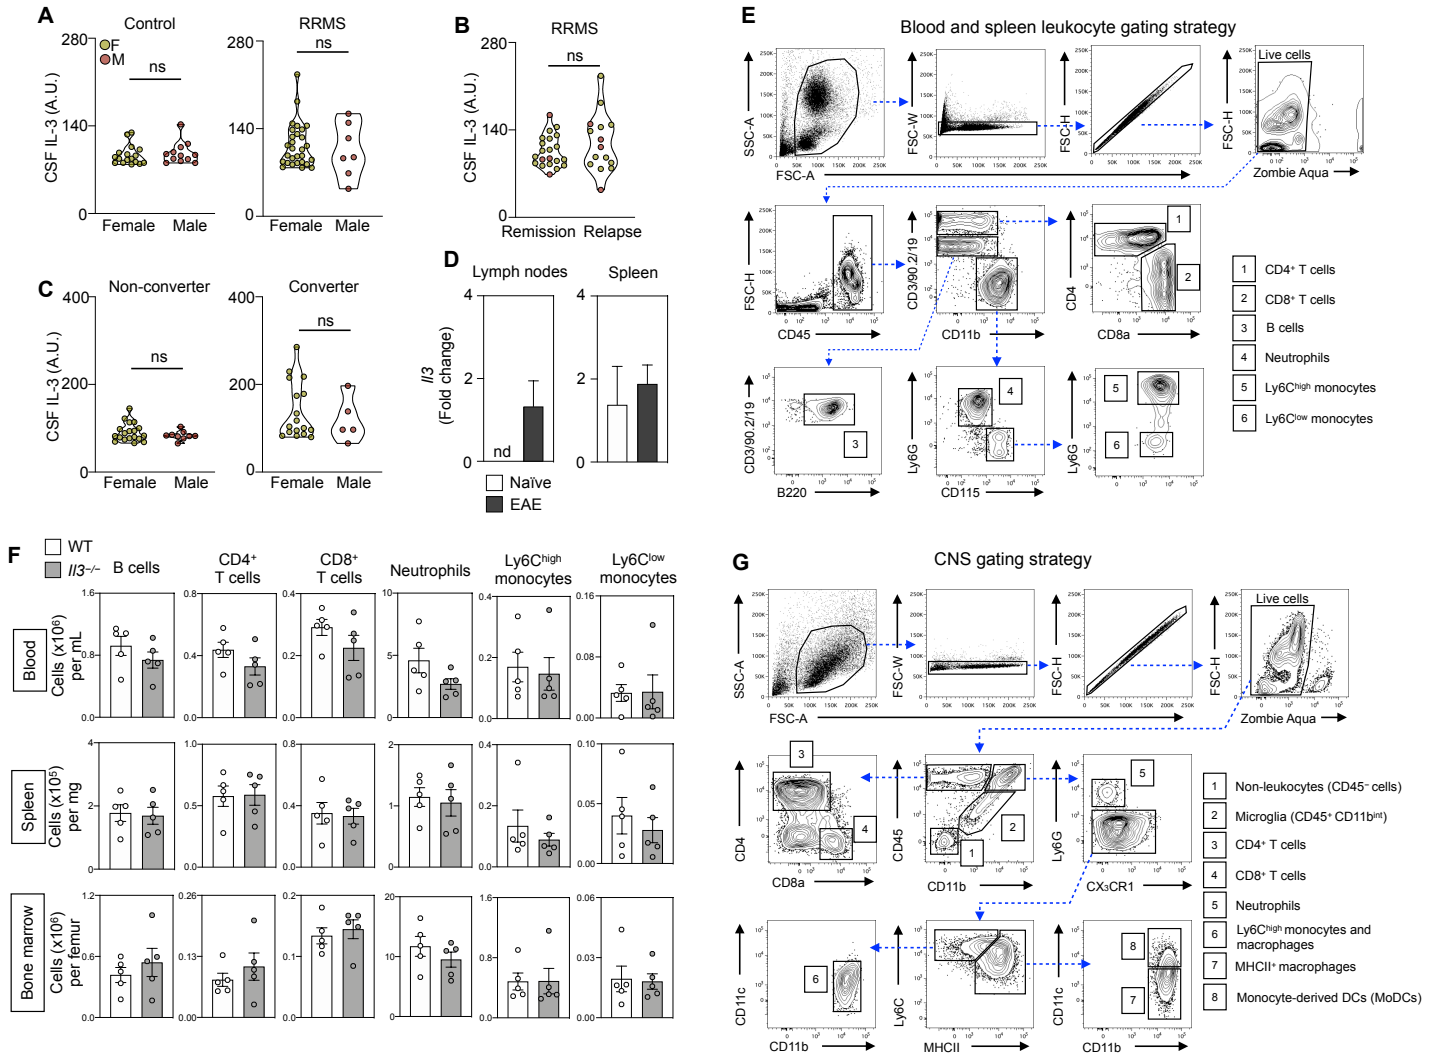

**Figure S1. CSF IL-3 in RRMS and *I/3* expression, gating strategy and enumeration of leukocytes in WT and *I/3*<sup>-/-</sup> EAE mice.**

(A) IL-3 amount in the CSF of male and female control and RRMS subjects (n=17 control females, 12 control males, 30 RRMS females, 7 RRMS males; Mann–Whitney *U*-tests).

(B) CSF IL-3 in male and female RRMS patients during relapse or remission (n=21 remission, 15 relapse; Mann–Whitney *U*-tests).

(C) CSF IL-3 amount in male and female converter and non-converter CIS patients (n=19 non-converter females, 9 non-converter males, 17 converter females, 5 converter males; Mann–Whitney *U*-tests).

(D) *I/3* expression in lymph nodes and spleen of control and EAE mice at peak (n=4–5 mice/group).

(E) Representative flow cytometric peripheral leukocyte gating strategy during the peak of EAE.

(F) Quantification of immune cell subsets in the blood, spleen, and bone marrow of WT and *I/3*<sup>-/-</sup> mice (n=5 mice/group).

(G) Representative flow cytometric CNS leukocyte gating strategy during the peak of EAE.

Mean±s.e.m.

CSF, cerebrospinal fluid; EAE, experimental autoimmune encephalomyelitis; ns, not significant.

Supplemental Figure 1 – related to Figure 1

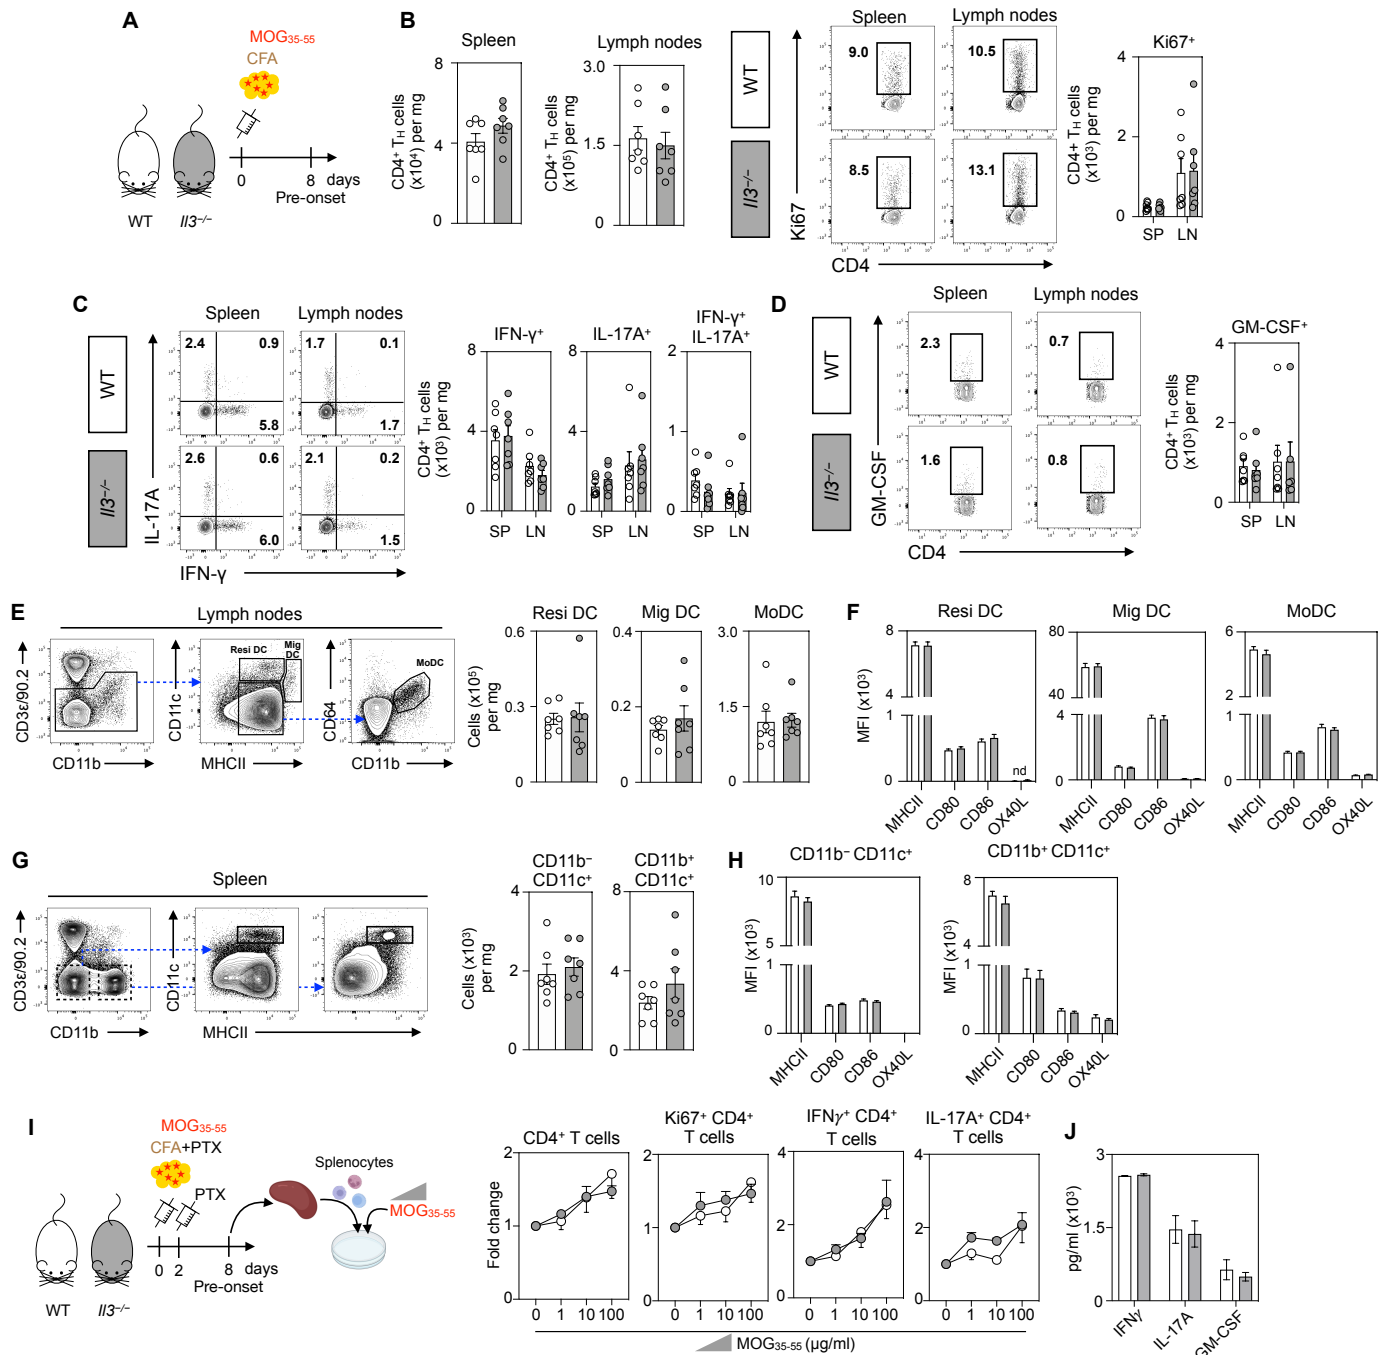

### Figure S2. IL-3 is dispensable for the peripheral priming of myelin-reactive CD4<sup>+</sup> T cells.

- (A) Schematic diagram of the experimental design. WT and *Il3*<sup>-/-</sup> mice by administering MOG<sub>35-55</sub> peptide emulsified in CFA by subcutaneous injection on day 0. Peripheral organs were collected for analyses on 8 dpi.
- (B) Flow-based quantification of CD4<sup>+</sup> T cells in the spleen and peripheral lymph nodes of in WT and *Il3*<sup>-/-</sup> mice and flow cytometric analysis of CD4<sup>+</sup> T cell proliferation via Ki67 staining in WT and *Il3*<sup>-/-</sup> mice (n=7 mice/group).
- (C) Flow cytometric analysis of spleen and lymph node CD4<sup>+</sup> T cell phenotypes based on IFN-γ and IL-17A staining in WT and *Il3*<sup>-/-</sup> mice (n=7 mice/group).
- (D) Flow cytometric analysis of GM-CSF-producing CD4<sup>+</sup> T cell numbers in WT and *Il3*<sup>-/-</sup> mice (n=7 mice/group).
- (E) Flow cytometry gating strategy and quantification for resident DCs, migratory DC, and moDC populations in lymph nodes (n=7 mice/group).
- (F) MFI of MHCII, CD80, CD86, and OX40L among resident DC, migratory DC, and moDC populations in lymph nodes (n=7 mice/group).
- (G) Flow cytometry gating strategy and quantification for CD11b<sup>-</sup>CD11c<sup>+</sup> and CD11b<sup>+</sup>CD11c<sup>+</sup> populations in spleen (n=7 mice/group).
- (H) MFI of MHCII, CD80, CD86, and OX40L among CD11b<sup>-</sup>CD11c<sup>+</sup> and CD11b<sup>+</sup>CD11c<sup>+</sup> populations in spleen (n=7 mice/group).
- (I) Schematic diagram of the experimental design for splenocyte analysis. WT and *Il3*<sup>-/-</sup> mice were administered MOG<sub>35-55</sub> peptide emulsified in CFA+PTX by subcutaneous injection on day 0. Splenocytes were collected and analyzed for fold change in CD4<sup>+</sup> T cells and cytokine production (Ki67<sup>+</sup> CD4<sup>+</sup>, IFN-γ<sup>+</sup> CD4<sup>+</sup>, IL-17A<sup>+</sup> CD4<sup>+</sup>) in response to increasing concentrations of MOG<sub>35-55</sub> (0, 1, 10, 100 μg/ml).
- (J) Bar graph showing cytokine levels (pg/ml x10<sup>3</sup>) for IFN-γ, IL-17A, and GM-CSF in splenocytes (n=7 mice/group).

- (G) Flow cytometry gating strategy and quantification for CD11b<sup>-</sup>CD11c<sup>+</sup> and CD11b<sup>+</sup>CD11c<sup>+</sup> cells in the spleen (n=7 mice/group).
- (H). MFI of MHCII, CD80, CD86, and OX40L among splenic CD11b<sup>-</sup>CD11c<sup>+</sup> and CD11b<sup>+</sup>CD11c<sup>+</sup> cells (n=7 mice/group).
- (I) Schematic of splenocyte *ex vivo* recall response and quantification of CD4<sup>+</sup> T cells and their positivity for Ki67, IFN $\gamma$ , and IL-17A at increasing doses of MOG<sub>35-55</sub> re-stimulation (n=3 mice/group).
- (J) Measurement of cytokines in the media of *ex vivo* splenocytes re-stimulated with 20 $\mu$ g MOG<sub>35-55</sub> (n=3 mice/group).

Mean $\pm$ s.e.m.

WT, wildtype; MOG, myelin oligodendrocyte glycoprotein; dpi, days post injection; DC, dendritic cell; MFI, mean fluorescence intensity.

Supplemental Figure 2 – related to Figure 1.

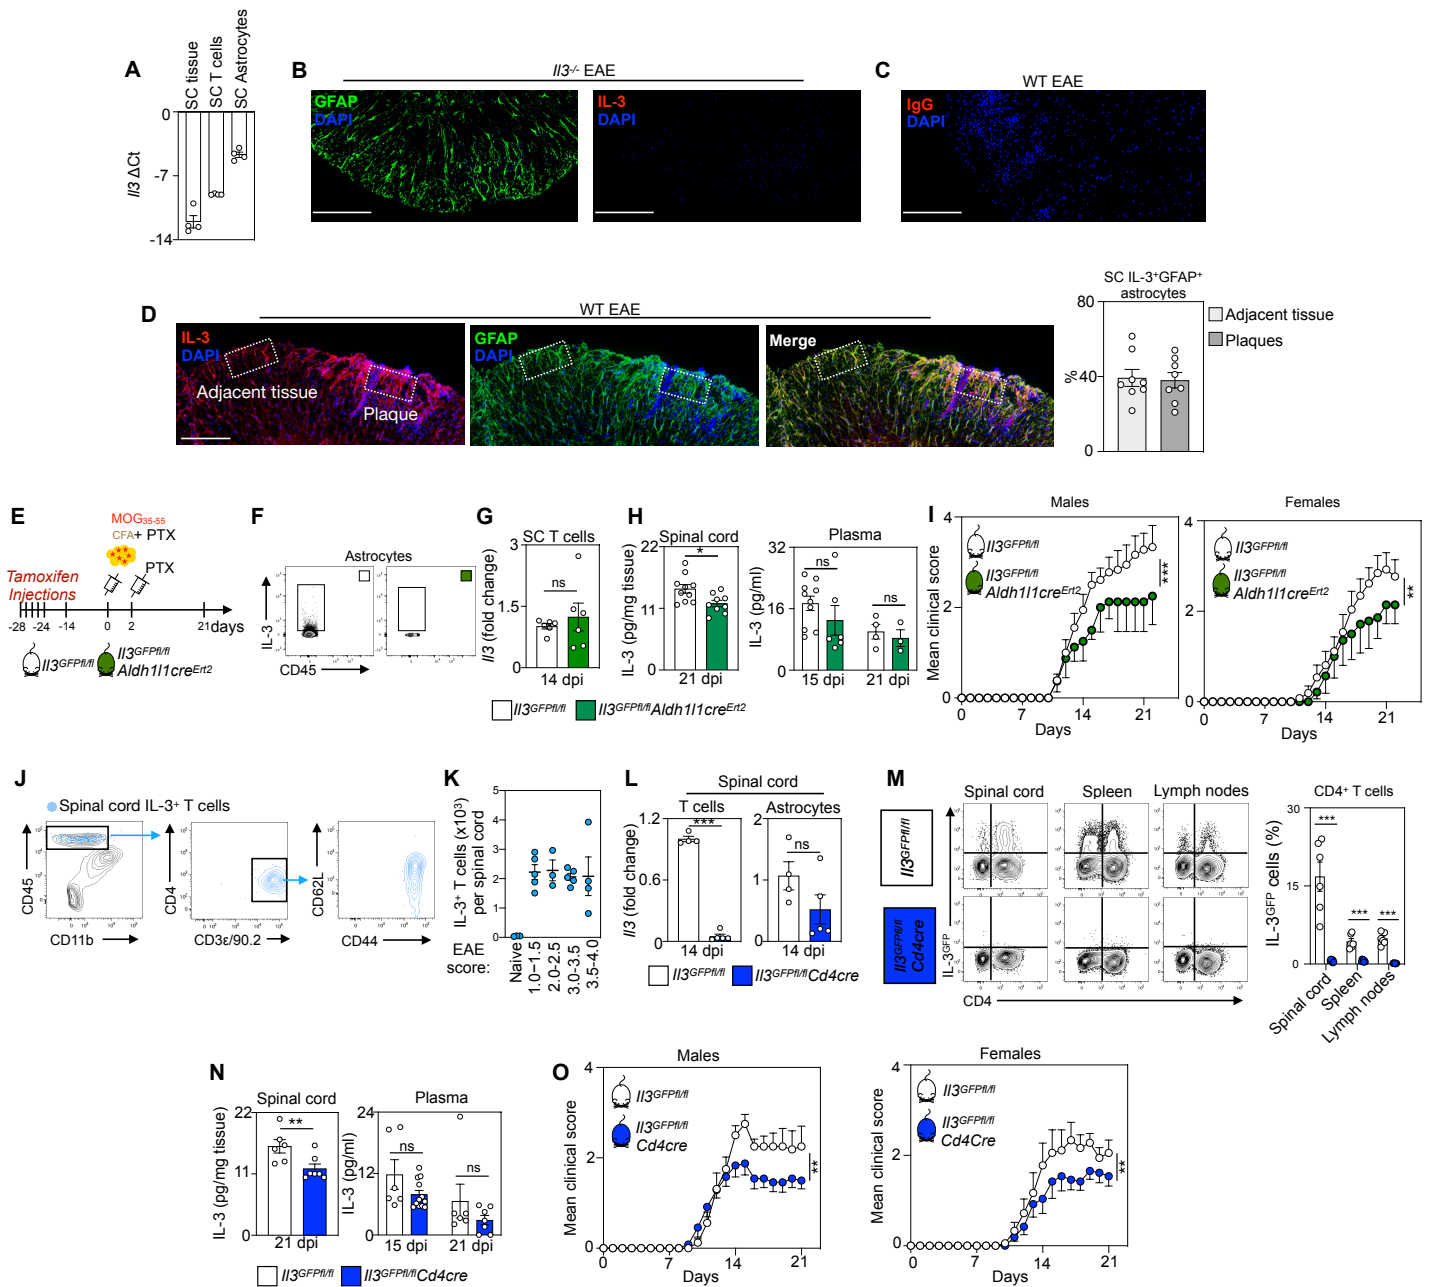

### Figure S3. Astrocytes and CD4<sup>+</sup> CD44<sup>hi</sup> effector T<sub>H</sub> cells produce IL-3 in the CNS.

(A) *Il3* transcript expression, presented as  $\Delta$ Ct, in SC tissue homogenate and CD44<sup>hi</sup>CD4<sup>+</sup> T cells and astrocytes sorted from the SC of WT mice at peak disease (n=4 mice).

(B) IL-3 and GFAP immunofluorescent staining of *Il3*<sup>-/-</sup> EAE mice.

(C) IgG control immunofluorescent staining.

(D) Representative image and per cell quantification of IL-3<sup>+</sup>GFAP<sup>+</sup> astrocytes in plaques and adjacent tissue in the SC of WT EAE mice. Scale bars represent 250  $\mu$ m (8 regions from 3 mice/group).

(E) Strategy of tamoxifen injection and EAE induction in *Il3*<sup>GFPfl/fl</sup> and *Il3*<sup>GFPfl/fl</sup> *Aldh11cre*<sup>Ert2</sup> mice.

(F) Astrocyte IL-3 in *Il3*<sup>GFPfl/fl</sup> and *Il3*<sup>GFPfl/fl</sup> *Aldh11cre*<sup>Ert2</sup> mice injected with tamoxifen.

(G) Measurement of *Il3* mRNA expression in CD44<sup>hi</sup>CD4<sup>+</sup> T cells sorted from the SC of *Il3*<sup>GFPfl/fl</sup> and *Il3*<sup>GFPfl/fl</sup> *Aldh11cre*<sup>Ert2</sup> at peak disease (n=6 mice/group; Mann-Whitney U-test).

(H) IL-3 protein abundance in SC homogenates and plasma of diseased *Il3*<sup>GFPfl/fl</sup> and *Il3*<sup>GFPfl/fl</sup> *Aldh11cre*<sup>Ert2</sup> mice (n=9-10 mice/group; Mann-Whitney U-test and two-way ANOVA).

(I) Mean clinical disease scores of male and female *Il3*<sup>GFPfl/fl</sup> and *Il3*<sup>GFPfl/fl</sup> *Aldh11cre*<sup>Ert2</sup> mice exposed to EAE (n=9 *Il3*<sup>GFPfl/fl</sup> males, 4 *Il3*<sup>GFPfl/fl</sup> *Aldh11cre*<sup>Ert2</sup> males, 13 *Il3*<sup>GFPfl/fl</sup> females, 7 *Aldh11cre*<sup>Ert2</sup> females; two-way ANOVA).

(J) Characterization and backgating of IL-3-producing T cells in the spinal cord during EAE.

(K) Association of IL-3-producing T cell abundance and disease severity (n=3-5 mice/group).

(L) Measurement of *Il3* mRNA expression in CD44<sup>hi</sup>CD4<sup>+</sup> T cells and astrocytes sorted from the SC of *Il3*<sup>GFPfl/fl</sup> and *Il3*<sup>GFPfl/fl</sup>*Cd4cre* mice at peak disease (n=4-5 mice/group; Mann–Whitney *U*-tests).

(M) Flow cytometry analysis of T cell IL-3 deletion in *Il3*<sup>GFPfl/fl</sup> and *Cd4creIl3*<sup>GFPfl/fl</sup> mice at peak disease (n=4-5 mice/group; one-way ANOVA).

(N) IL-3 protein abundance in SC homogenates and plasma of diseased *Il3*<sup>GFPfl/fl</sup> and *Il3*<sup>GFPfl/fl</sup>*Cd4cre* mice (n=6-12 mice/group; Mann–Whitney *U*-test and two-way ANOVA).

(O) Mean clinical disease scores of male and female *Il3*<sup>GFPfl/fl</sup> and *Il3*<sup>GFPfl/fl</sup>*Cd4cre* mice exposed to EAE (n= 12 *Il3*<sup>GFPfl/fl</sup> males, 8 *Il3*<sup>GFPfl/fl</sup>*Cd4cre* males, 13 *Il3*<sup>GFPfl/fl</sup> females, 9 *Il3*<sup>GFPfl/fl</sup>*Cd4cre* females; two-way ANOVA). Mean±s.e.m., \*p<0.05, \*\*p<0.01, \*\*\*p<0.001.

ΔCt, delta CT; GFAP, glial fibrillary acidic protein; DAPI, 4',6-diamidino-2-phenylindole; SC, spinal cord.

Supplemental Figure 3 – related to Figures 2 and 3

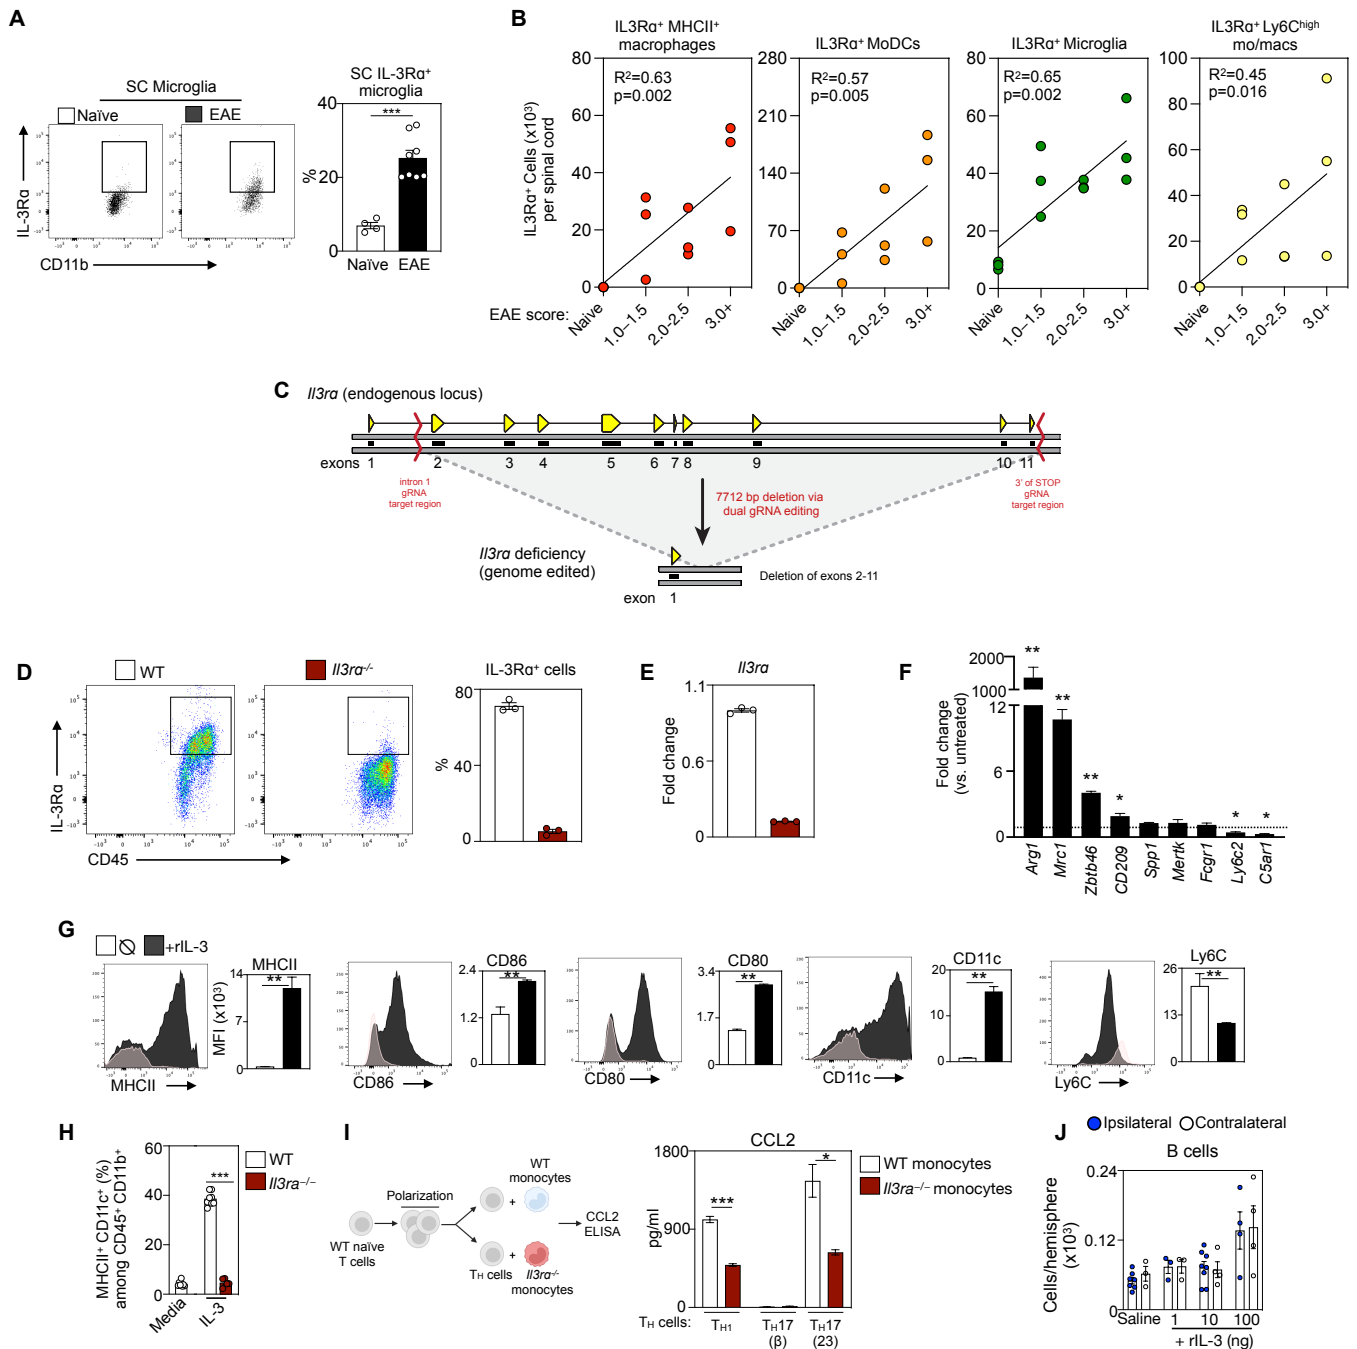

### Figure S4. IL-3Ra<sup>+</sup> myeloid cells and the generation of *Il3ra*<sup>-/-</sup> mice.

- (A) Analysis of IL-3Ra<sup>+</sup> microglia in the SC of healthy (naïve) and EAE WT mice (n=4-8 mice/group; Mann-Whitney *U*-test).
- (B) Analysis of IL-3Ra<sup>+</sup> cells and disease score (n=2-3 mice/group; Pearson correlation).
- (C) Schematic of the endogenous *Il3ra* locus and nuclease-based dual guide RNA (gRNA) editing strategy to generate *Il3ra* knockout mice.
- (D) IL-3Ra production by bone marrow monocytes isolated from WT or *Il3ra*<sup>-/-</sup> mice quantified by flow cytometry.
- (E) qPCR analysis of *Il3ra* mRNA expression in BM monocytes isolated from WT or *Il3ra*<sup>-/-</sup> mice (n=3 mice/group).
- (F) Analysis of gene expression for APC-related genes in monocytes stimulated for 24 hr in the presence of rIL-3 (n=3 mice/group; one-way ANOVA).
- (G) MFI of MHCII, CD86, CD80, CD11c, and Ly6C<sup>hi</sup> in monocytes cultures left untreated or stimulated with rIL-3 (n=4-5 mice; Mann-Whitney *U*-tests).
- (H) MHCII<sup>+</sup> CD11c<sup>+</sup> cells among CD45<sup>+</sup> CD11b<sup>+</sup> cells in media or IL-3 stimulated conditions (n=4-5 mice; Mann-Whitney *U*-tests).
- (I) Polarization of WT naive T cells with WT monocytes or *Il3ra*<sup>-/-</sup> monocytes. CCL2 ELISA results show significantly lower levels in *Il3ra*<sup>-/-</sup> monocytes (n=23).
- (J) B cell counts in the hemisphere (x10<sup>3</sup>) in response to rIL-3 (1, 10, 100 ng) in ipsilateral (filled circles) and contralateral (open circles) sides (n=4-5 mice; Mann-Whitney *U*-tests).

(H) Frequency of MHCII<sup>+</sup>CD11c<sup>+</sup> cells among CD45<sup>+</sup>CD11b<sup>+</sup> cells in WT and *Il3ra*<sup>-/-</sup> monocyte culture after stimulation with rIL-3 (n=5-8 mice/group; one-way ANOVA).

(I) Co-culture of polarized T cell subsets with WT or *Il3ra*<sup>-/-</sup> monocytes and measurement of CCL2 in the media by ELISA (n=3 mice/group; one-way ANOVA).

(J) Enumeration of B cells in the brain of mice 24 hours after stereotactic injection of 0, 1, 10, or 100 ng of rIL-3 (n=3-8 mice/group).

Mean±s.e.m., \*p<0.05, \*\*p<0.01, \*\*\*p<0.001.

SC, spinal cord; WT, wildtype; EAE, experimental autoimmune encephalomyelitis; BM, bone marrow; rIL-3, recombinant interleukin-3; MFI, Mean fluorescence intensity.

Supplemental Figure 4 – related to Figure 4.

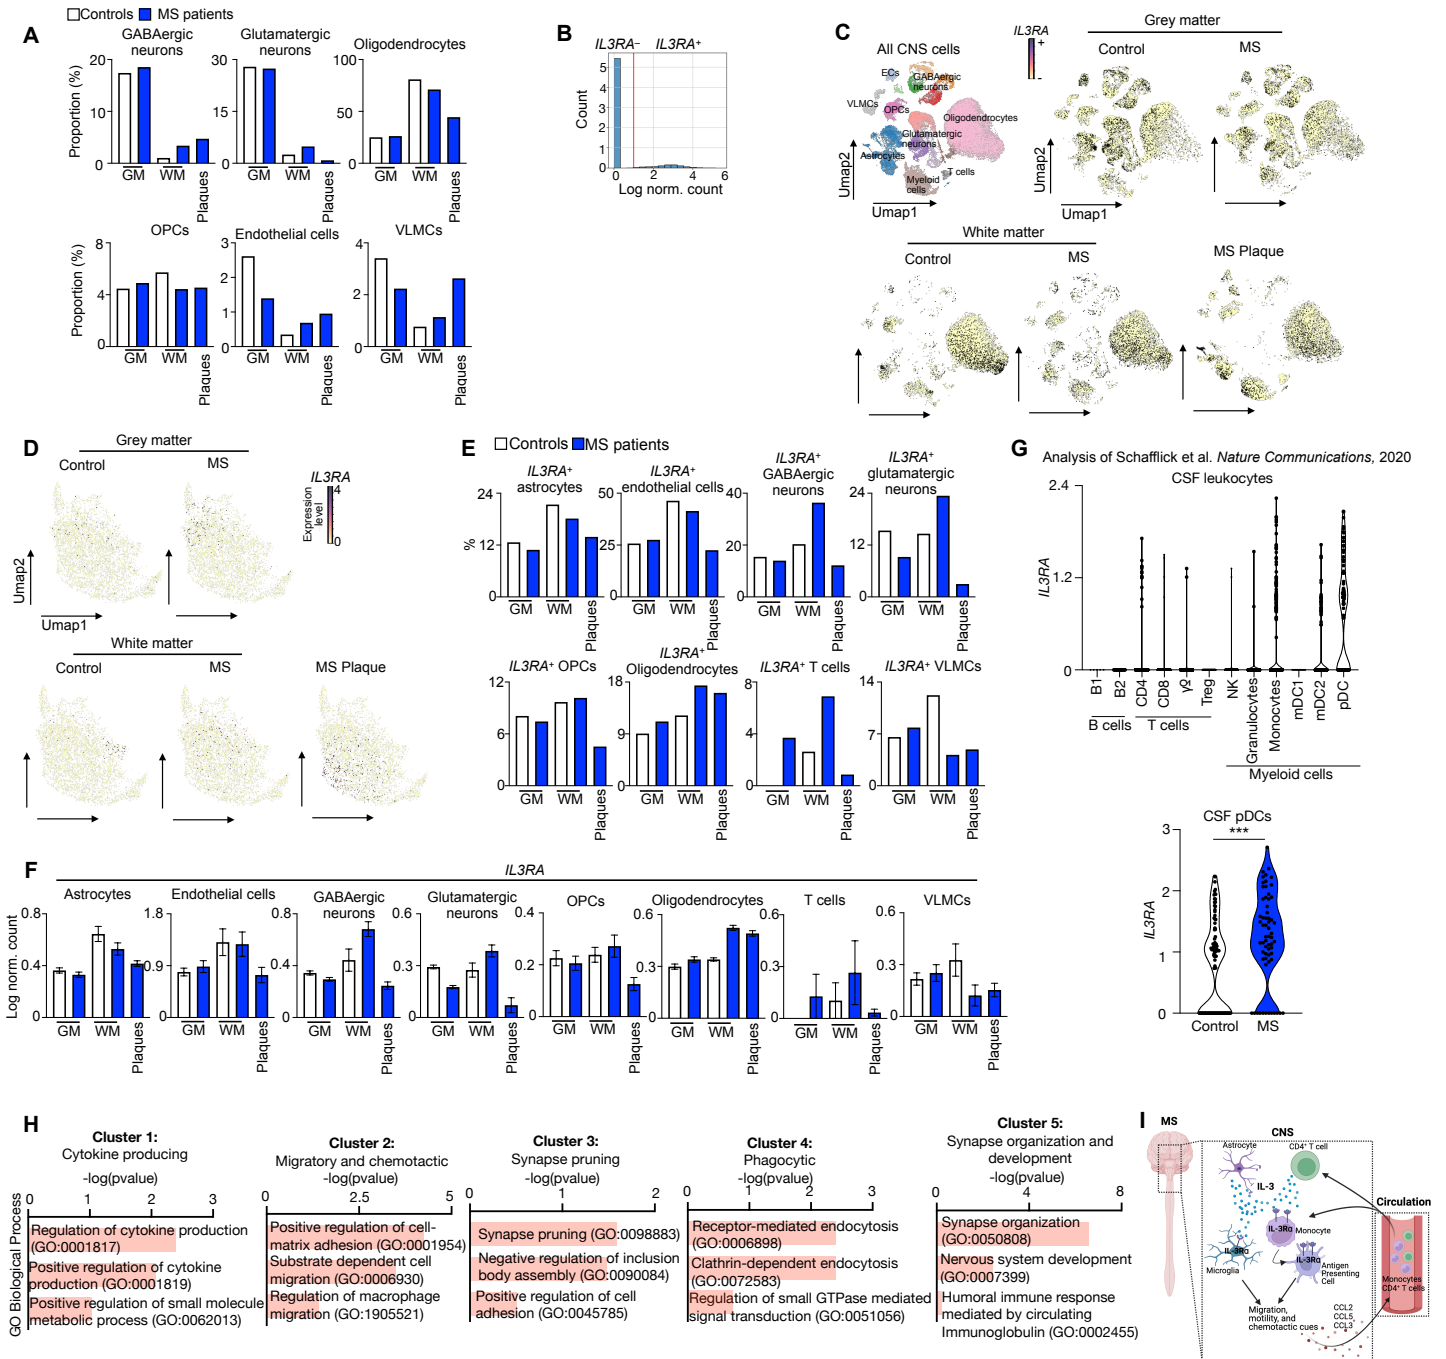

**Figure S5. IL-3:IL-3RA signaling in human MS.**

(A) Proportion of each CNS cell type across tissue regions and disease states.

(B) Binary strategy to identify *IL3RA* expressing cells.

(C) Umap visualization of *IL3RA* expressing cells in all CNS cells across all regions and conditions.

(D) Umap showing expression of *IL3RA* among myeloid cells in each tissue and condition.

(E) Quantification of *IL3RA*<sup>+</sup> cells among each CNS population across all regions and disease status.

(F) *IL3RA* expression among each CNS population across all regions and disease status.

(G) Analysis of human scRNAseq data of CSF leukocytes from Schafflick et al. 2020 showing expression of *IL3RA* amongst all CSF leukocyte populations in control subjects and *IL3RA* expression in pDCs of control and MS subjects (Mann–Whitney *U*-test).

(H) Pathway analysis of the 5 plaque myeloid cell clusters.

(I) Schematic summarizing the role of astrocyte- and T cell-derived IL-3 promoting monocyte differentiation into APCs and the generation of migratory, motility, and chemotactic cues by resident and peripherally-derived myeloid cells that further recruit monocytes and CD4<sup>+</sup> T cells to the CNS.

n=6 unaffected controls and 6 MS patients

Mean±s.e.m. \*\*\*p<0.001.



CNS, central nervous system; CSF, cerebrospinal fluid.  
Supplemental Figure 5 – related to Figure 5.
